# Supplementary material
Source: PubMed Central journal article supplement (PMC9851973)

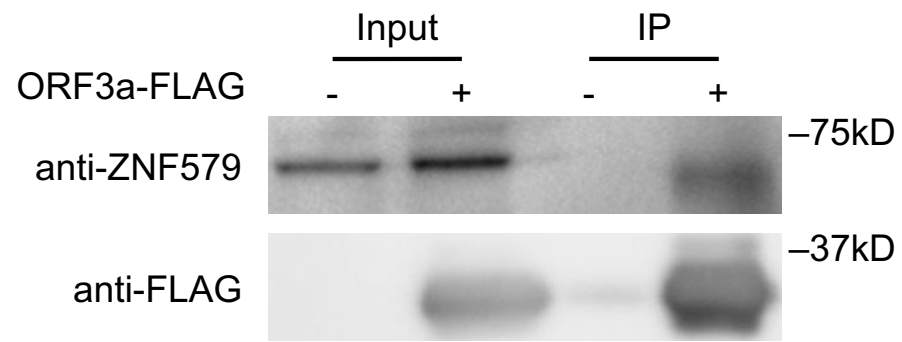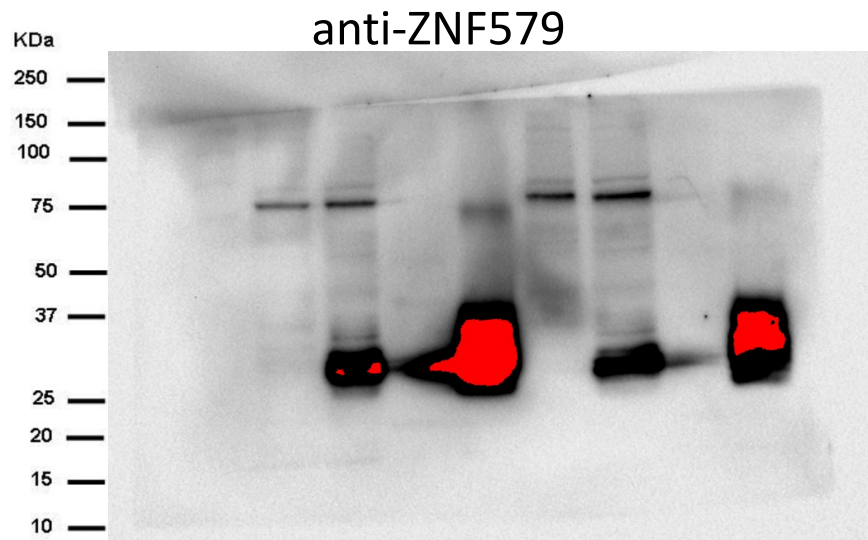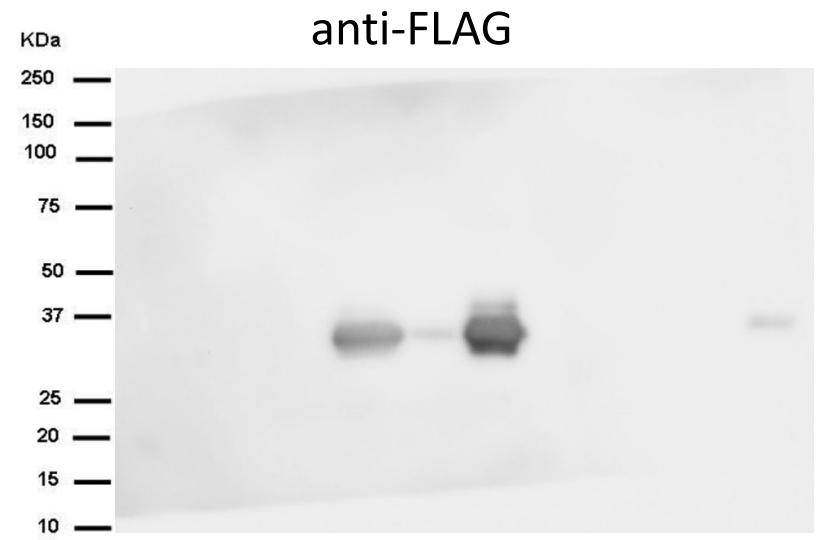

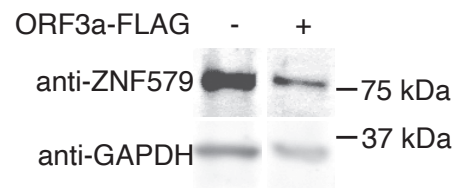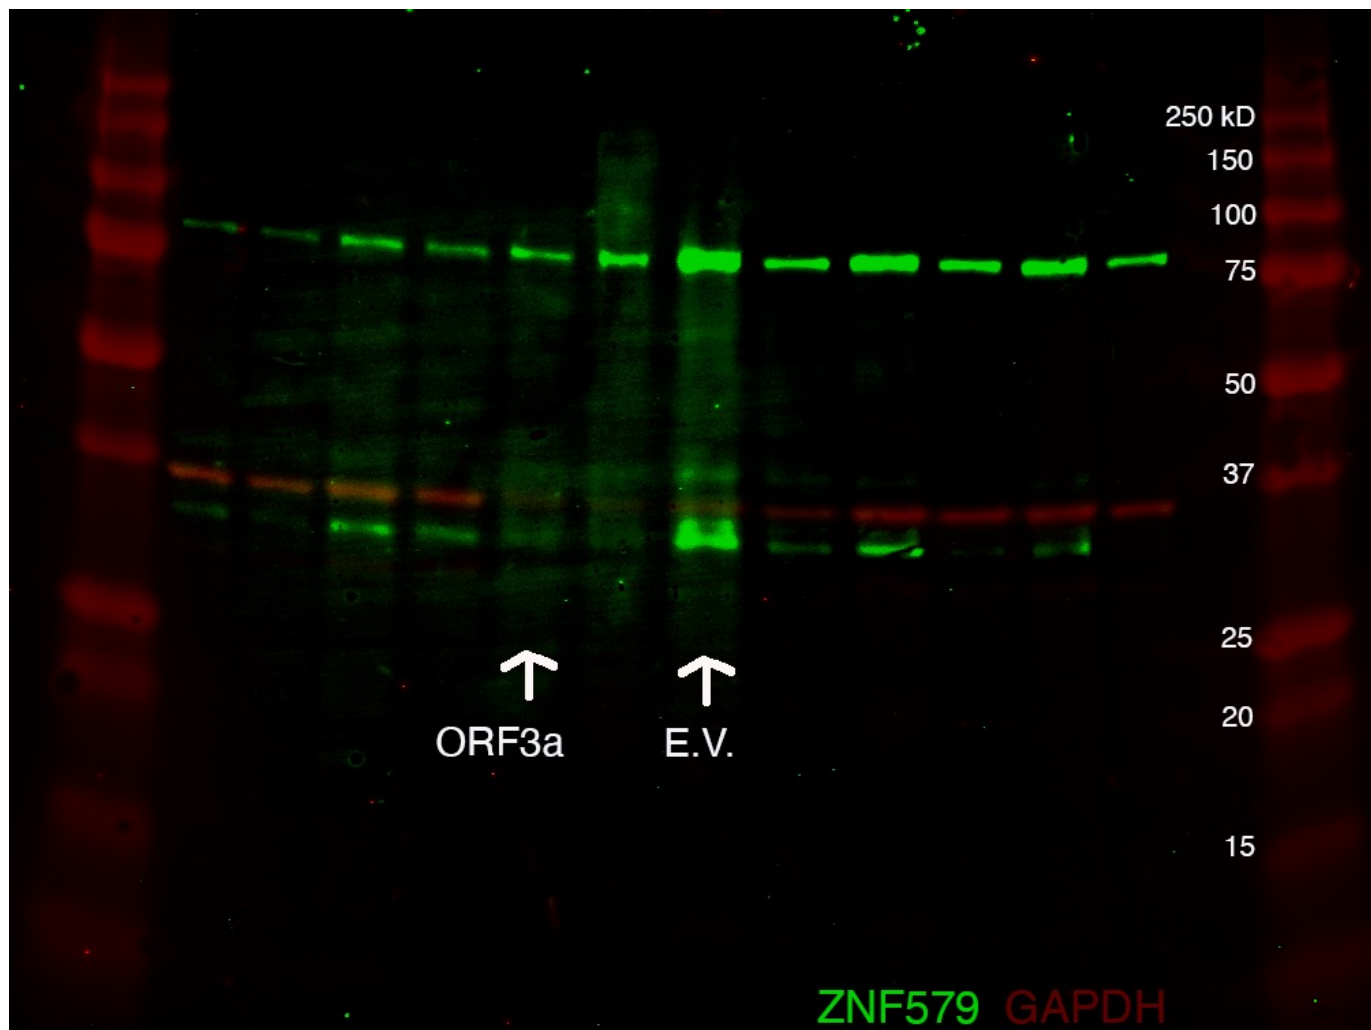

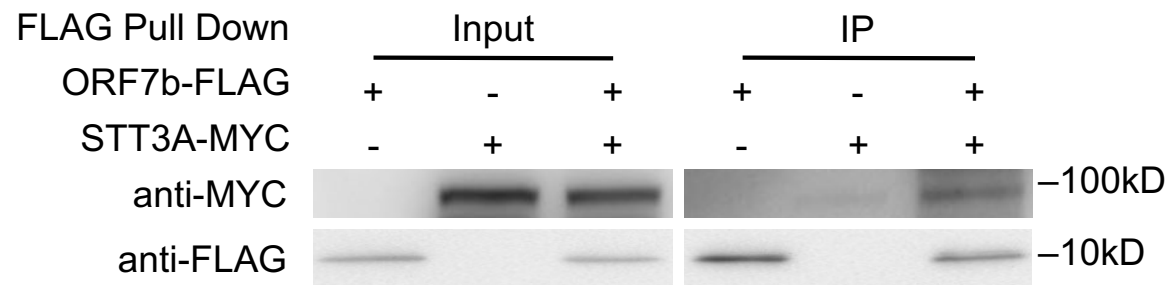

anti-MYC long exposure

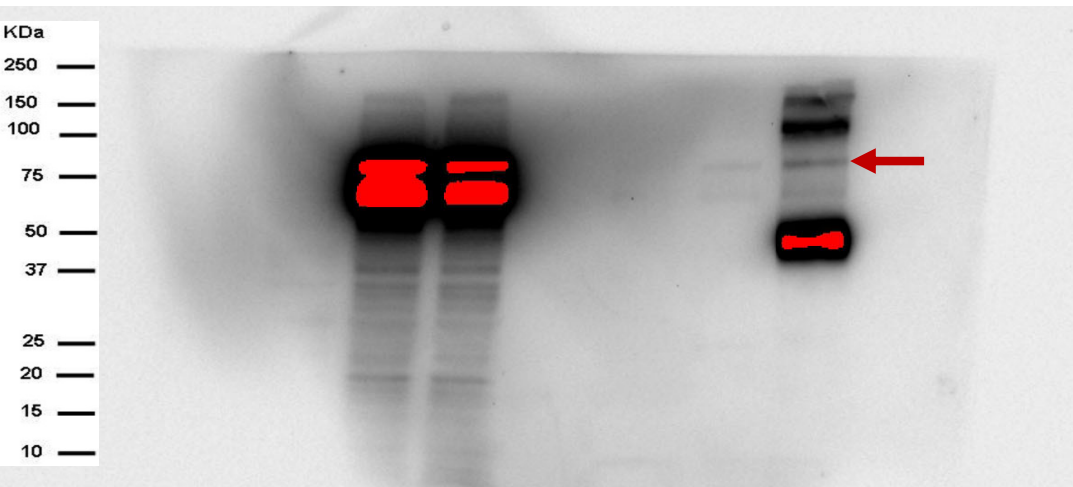

anti-MYC short exposure

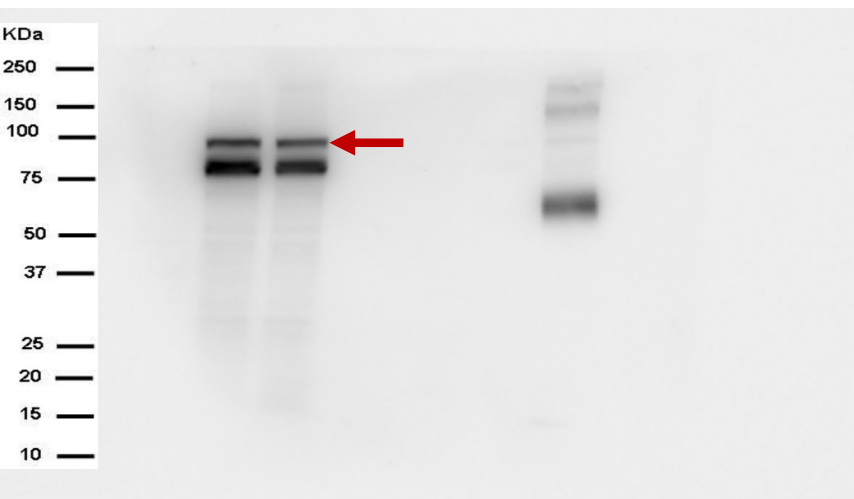

anti-FLAG

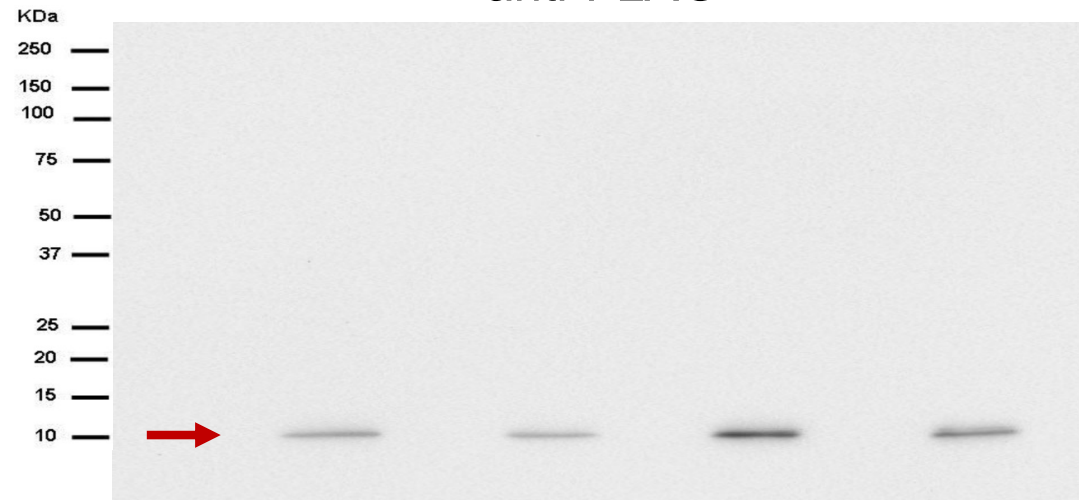

FLAG Pull Down

ORF7b-FLAG

Sec61-V5

anti-V5

anti-FLAG

Input

IP

+

-

+

+

-

+

-

+

+

-

+

+

-50kD

-10kD

anti-V5

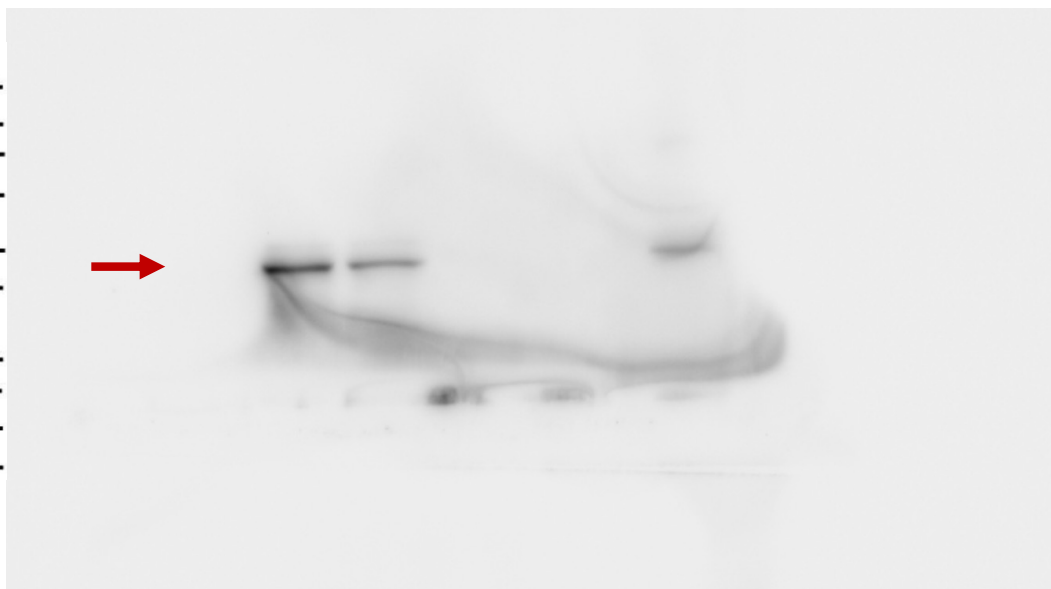

anti-FLAG

KDa

250

150

100

75

50

37

25

20

15

10

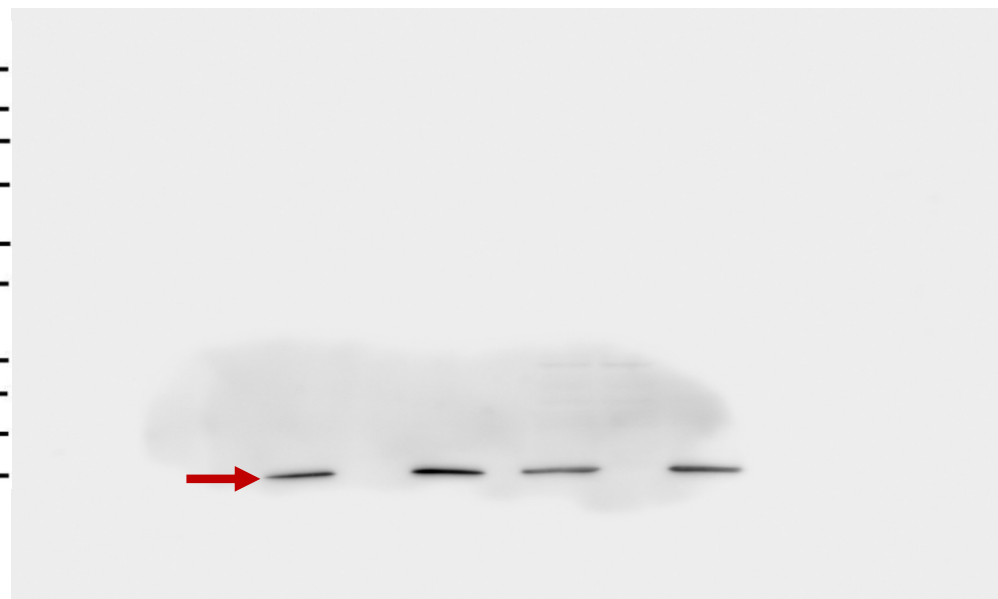

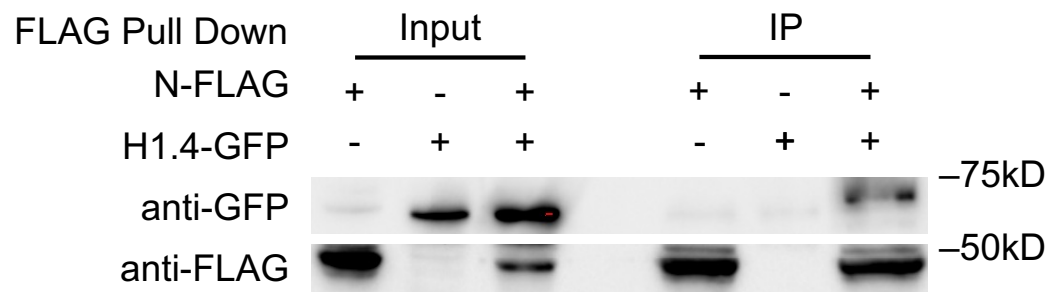

anti-GFP

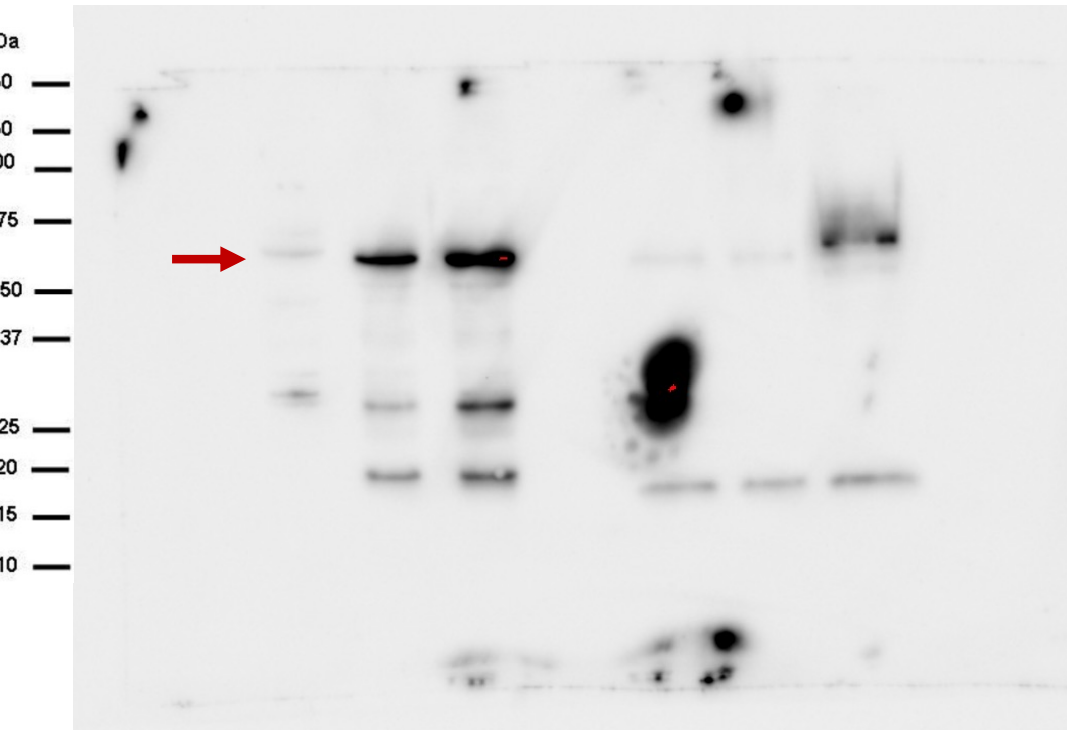

anti-FLAG

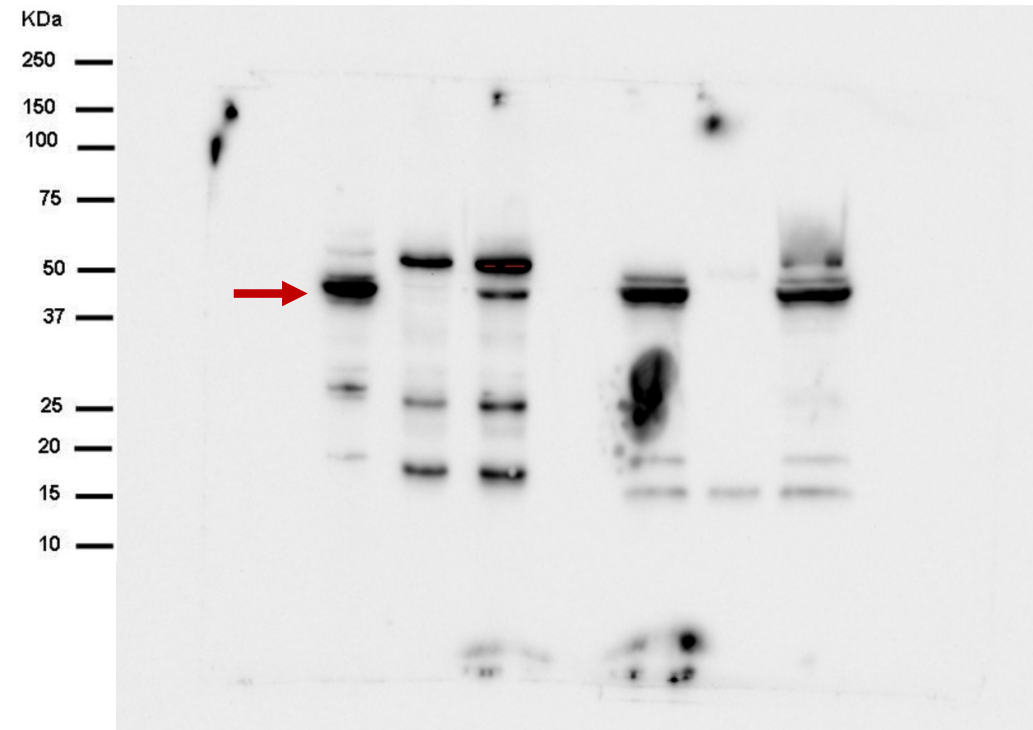

Supplement: NIHMS1846738-supplement-Source_Data.pdf [file NIHMS1846738-supplement-Source_Data.pdf]
