# Supplementary material
Source: PubMed Central journal article supplement (PMC9851973)
Supplement: NIHMS1846738-supplement-Supplementary_Figures.pdf [file NIHMS1846738-supplement-Supplementary_Figures.pdf]

# **A comprehensive SARS-CoV-2–human protein–protein interactome reveals COVID-19 pathobiology and potential host therapeutic targets**

---

In the format provided by the authors and unedited

**Figure S1**

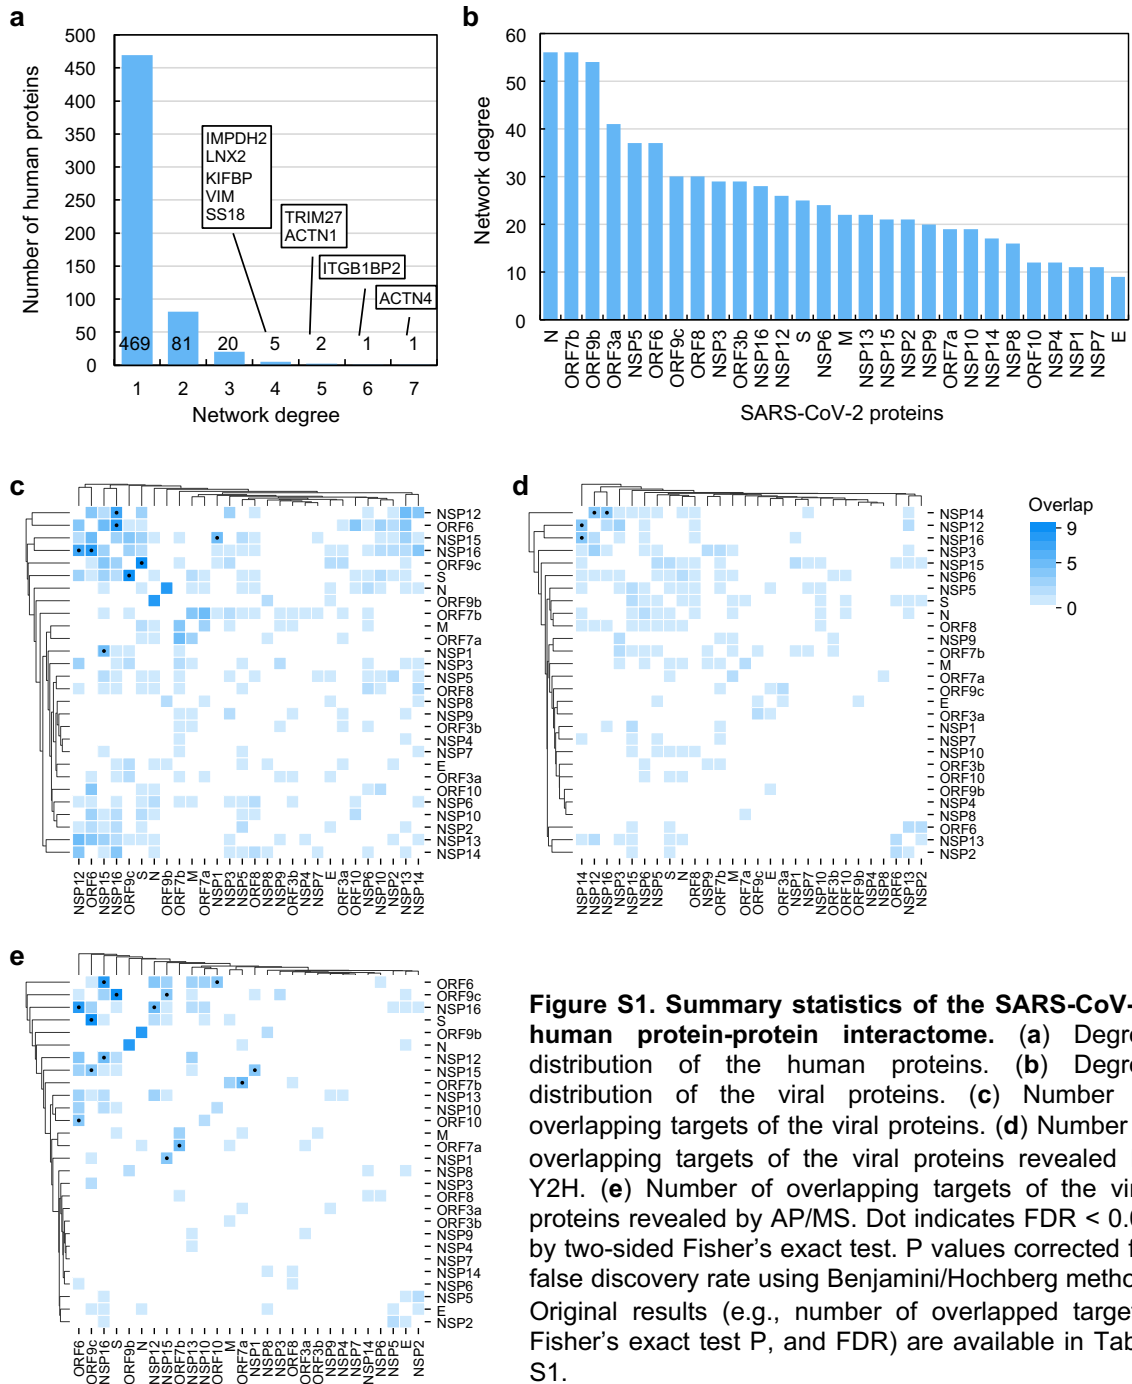

**Figure S1. Summary statistics of the SARS-CoV-2-human protein-protein interactome.** (a) Degree distribution of the human proteins. (b) Degree distribution of the viral proteins. (c) Number of overlapping targets of the viral proteins. (d) Number of overlapping targets of the viral proteins revealed by Y2H. (e) Number of overlapping targets of the viral proteins revealed by AP/MS. Dot indicates FDR < 0.05 by two-sided Fisher's exact test. P values corrected for false discovery rate using Benjamini/Hochberg method. Original results (e.g., number of overlapped targets, Fisher's exact test P, and FDR) are available in Table S1.

**Figure S2**

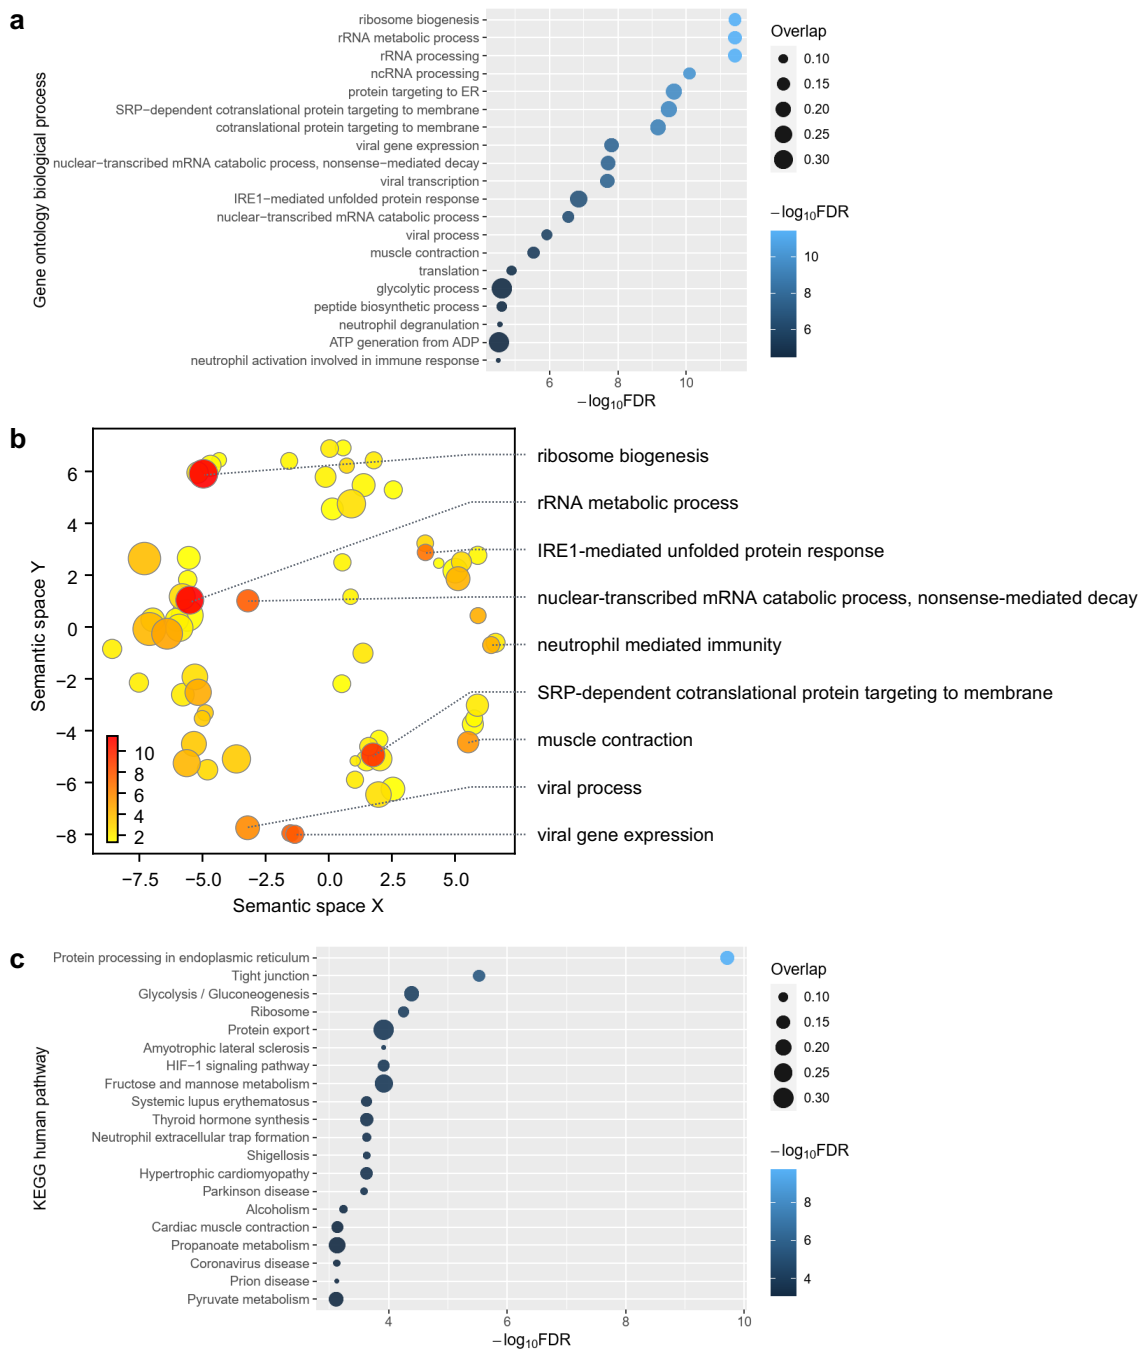

**Figure S2. Pathway and gene ontology enrichment analyses for SARS-CoV-2 host factors.** Enrichment analyses were performed with Enrichr. (a) Gene ontology (GO) biological process enrichment. (b) Summarization of the significant ( $FDR < 0.05$ ) GO terms using Revigo. Color scale indicates  $-\log_{10}FDR$ . Dot size indicates  $\log_{10}$ (number of annotations for the terms in the EBI GOA database). (c) KEGG human pathway enrichment.

**Figure S3**

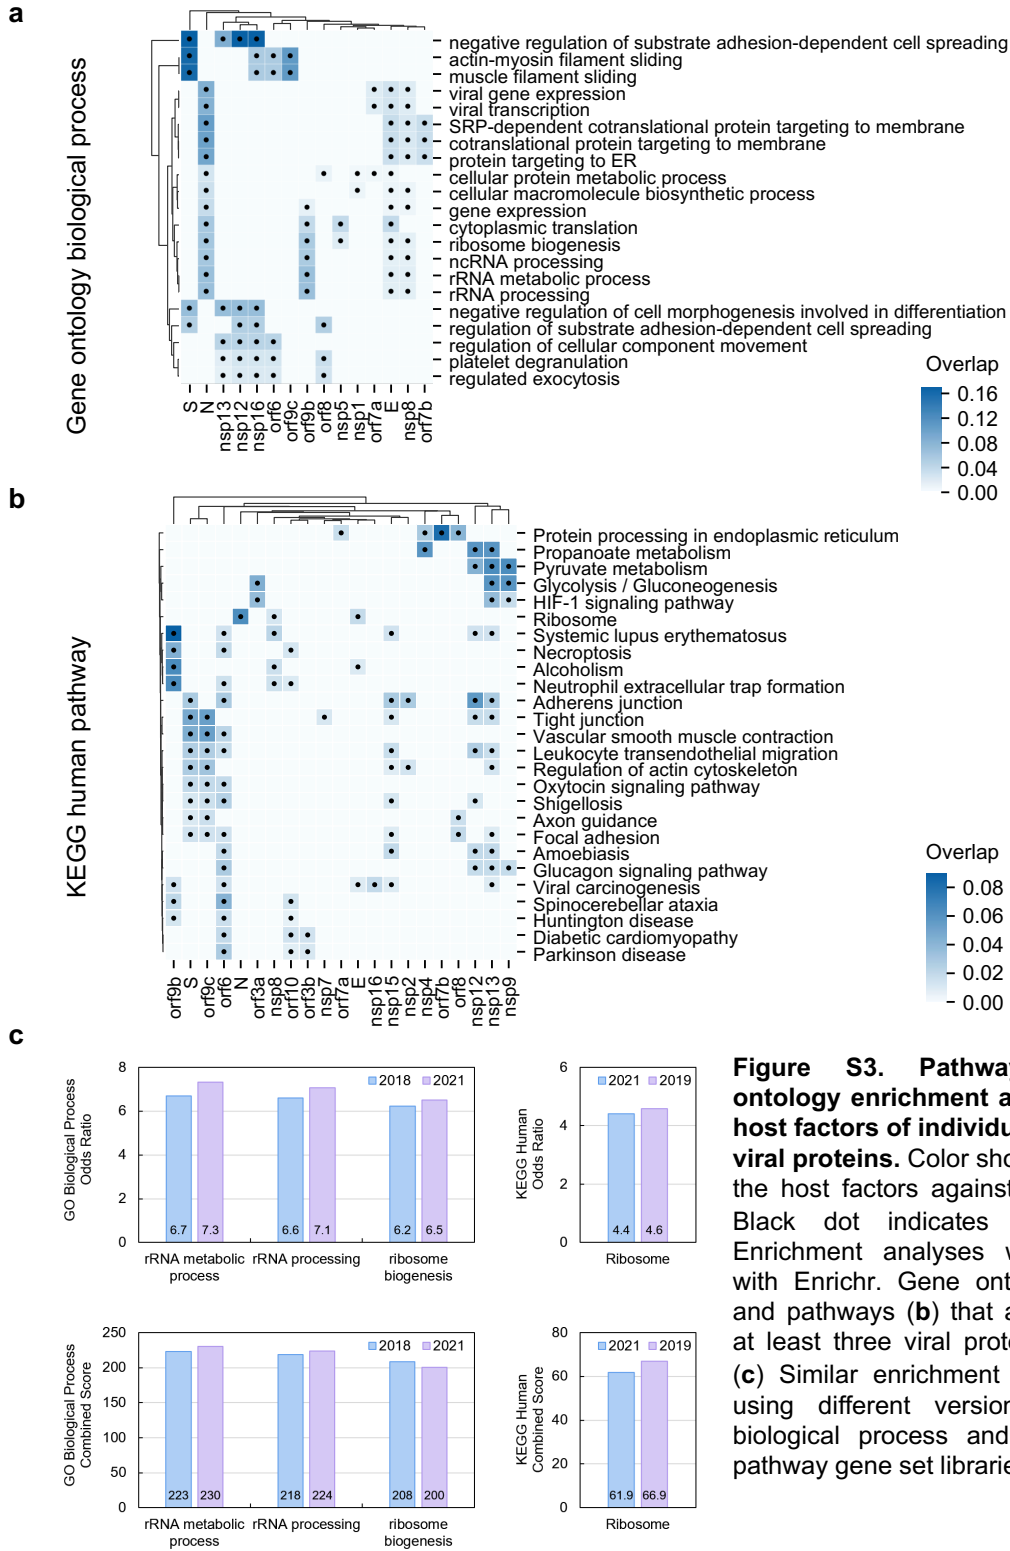

**Figure S3. Pathway and gene ontology enrichment analyses for the host factors of individual SARS-CoV-2 viral proteins.** Color shows % overlap of the host factors against the gene sets. Black dot indicates FDR < 0.05. Enrichment analyses were performed with Enrichr. Gene ontology (a) terms and pathways (b) that are significant in at least three viral proteins are shown. (c) Similar enrichment analysis results using different versions of the GO biological process and KEGG human pathway gene set libraries.

**Figure S4**

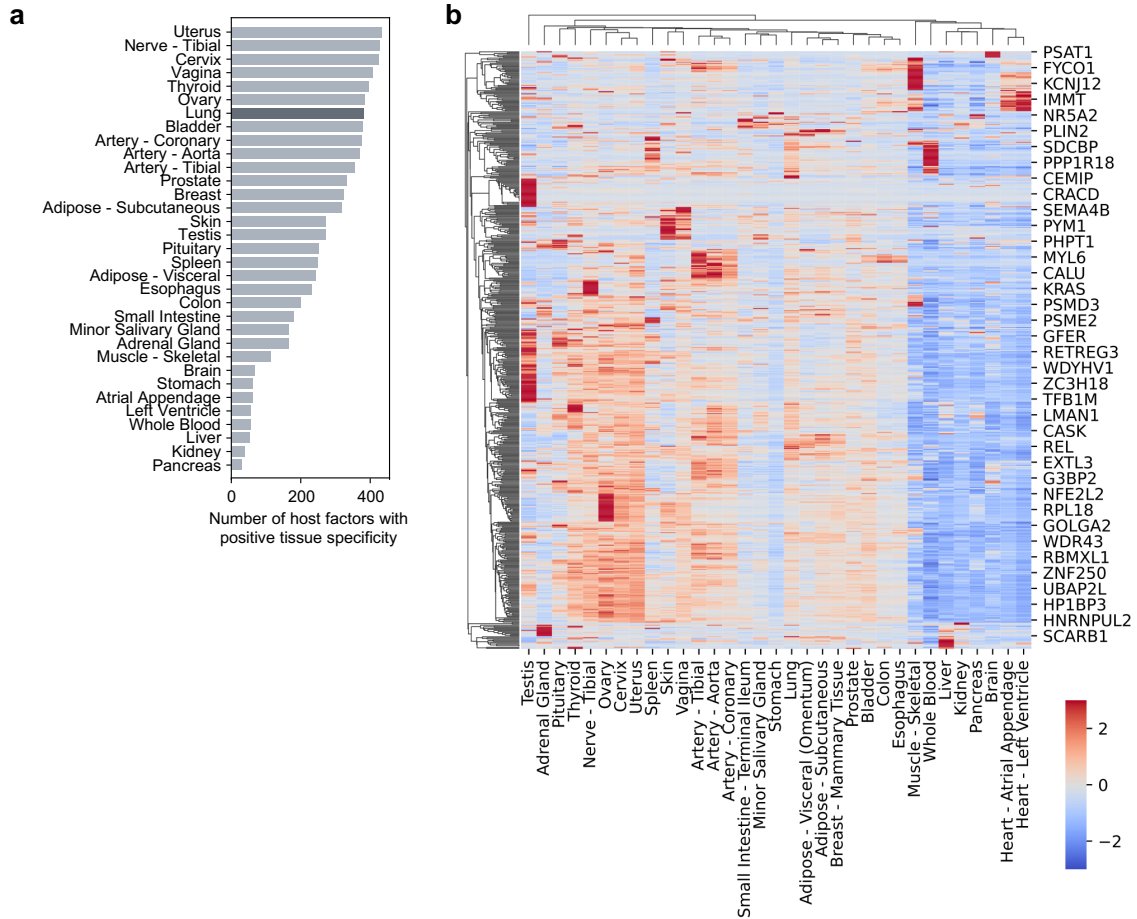

**Figure S4. Overview of the expression of the host factors.** (a) Ranking of the number of host factors with positive tissue specificity in each tissue. (b) Tissue-specificity of the host factors. RNA-Seq data in transcript per million were downloaded from GTEx V8 (<https://www.gtexportal.org/home/>). Data were z-score scaled for each gene across 33 tissues.

**Figure S5**

**a. Carvedilol**

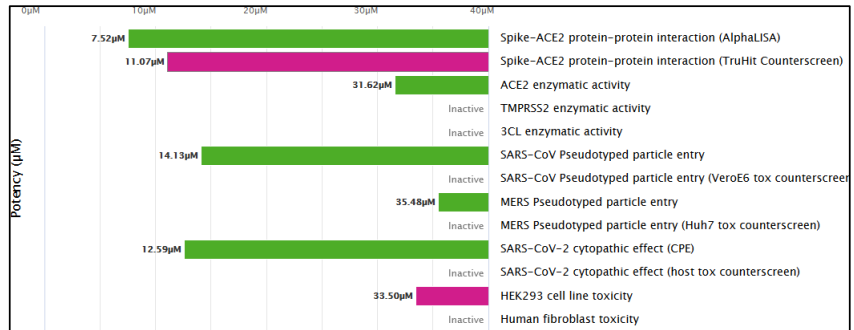

**b. Apremilast**

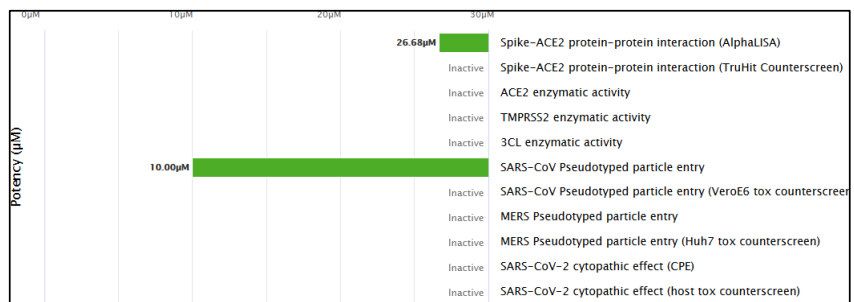

**c. Mefenamic acid**

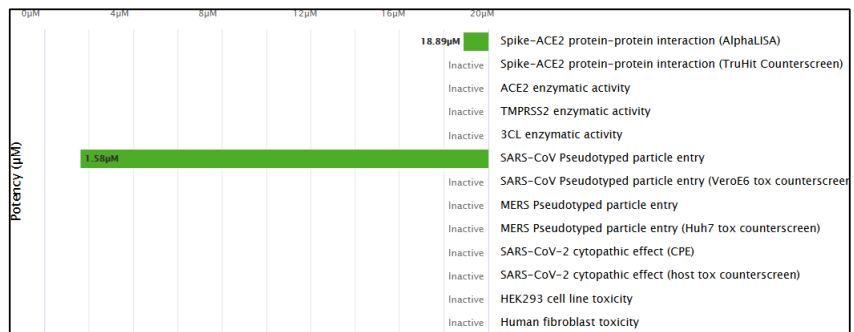

**d. Balsalazide**

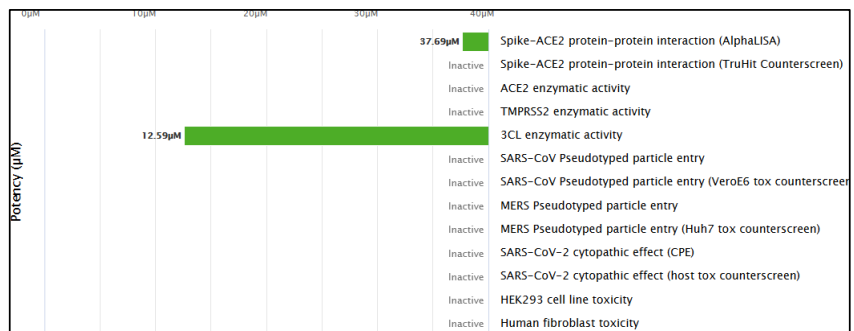

Figure S5, continued

e. Azithromycin

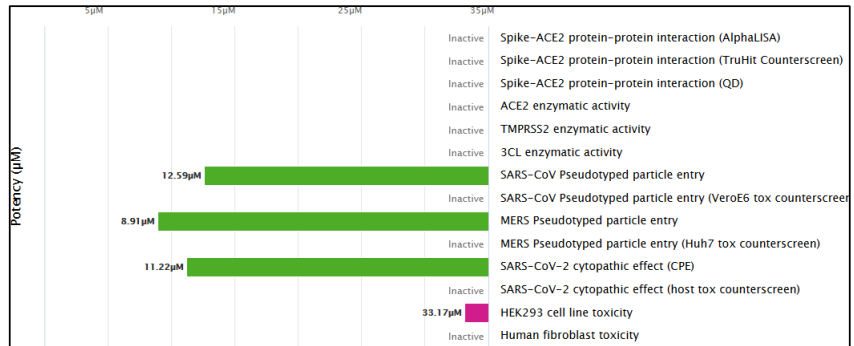

f. Toremfifene

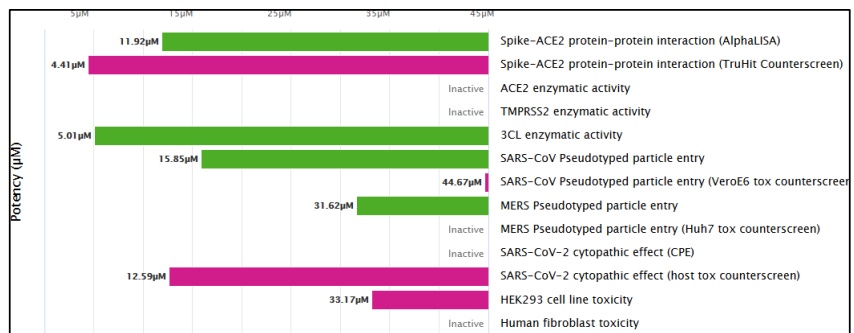

g. Hydrochlorothiazide

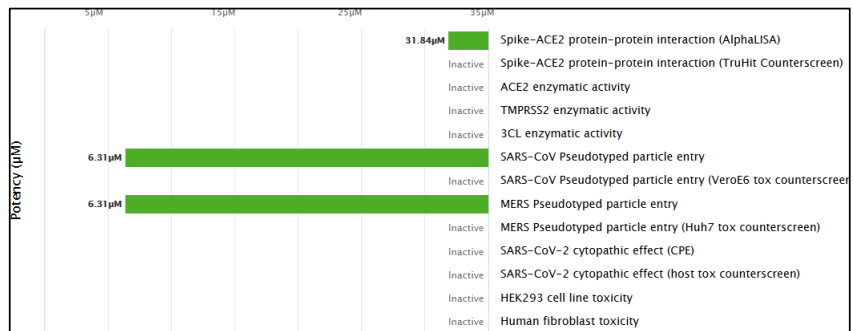

h. Nilvadipine

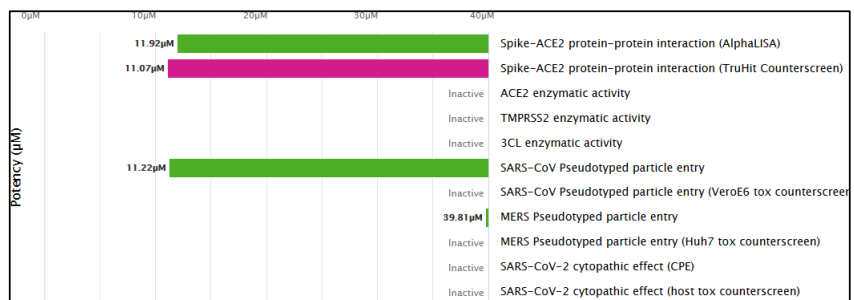

Figure S5, continued

i. Amodiaquin

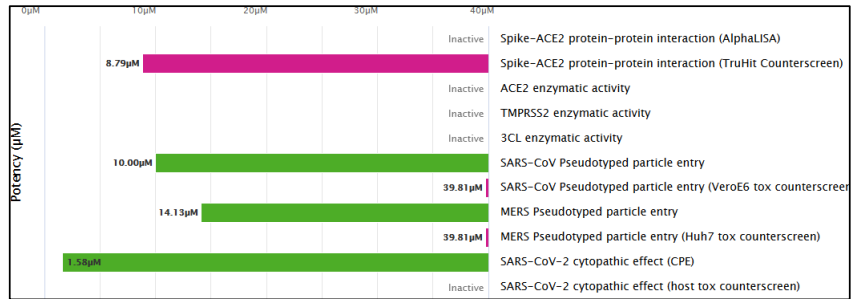

j. Tetracycline

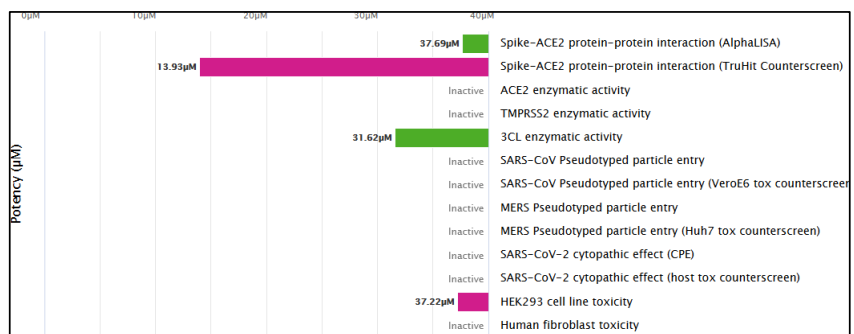

k. Xylometazoline

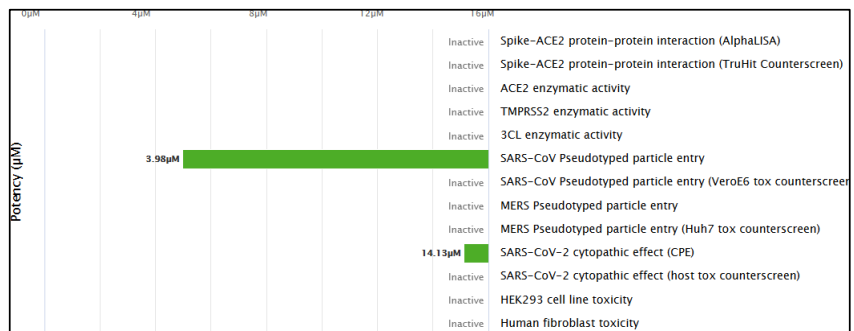

l. Decitabine

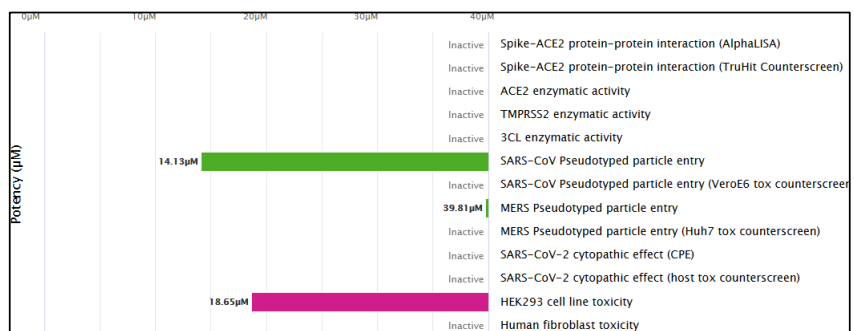



Figure S5, continued

m. Adefovir dipivoxil

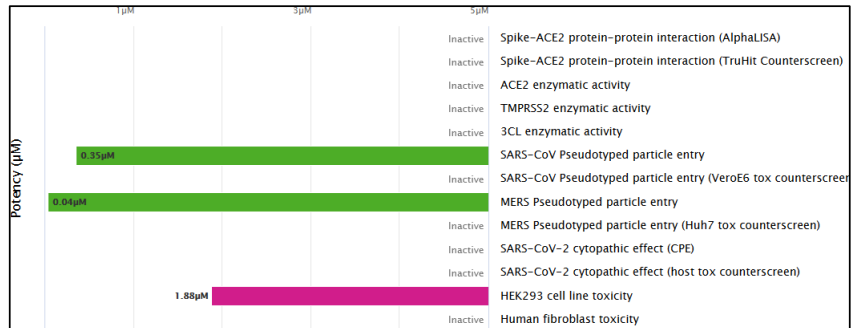

n. Venetoclax

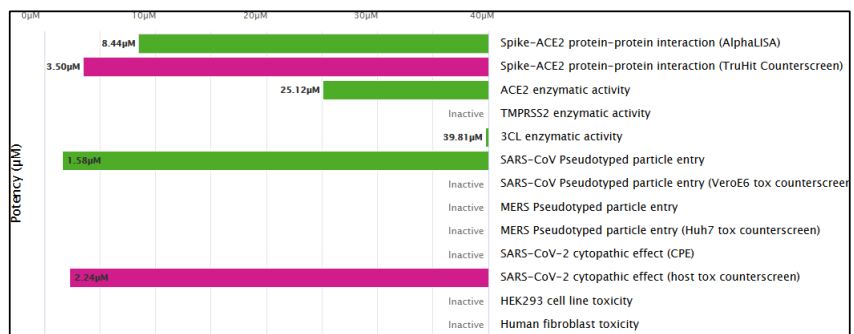

o. Calcipotriol

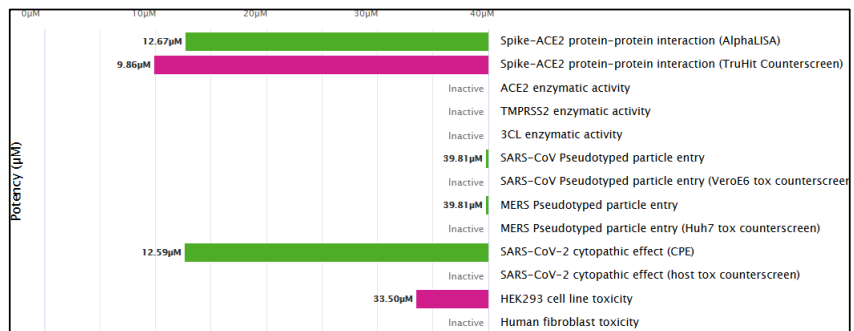

p. Amitriptyline

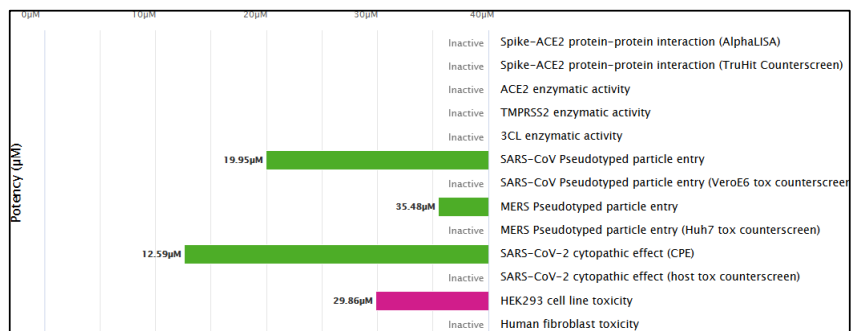

Figure S5, continued

q. Fenoprofen

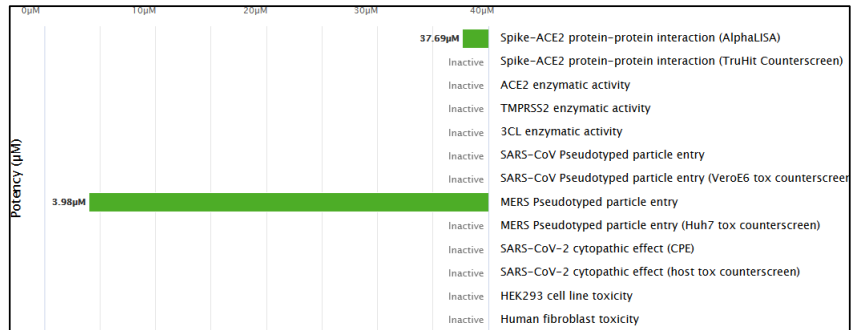

r. Tipranavir

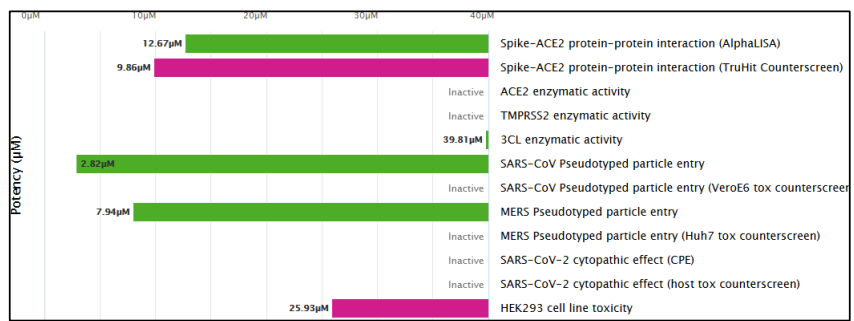

s. Probucol

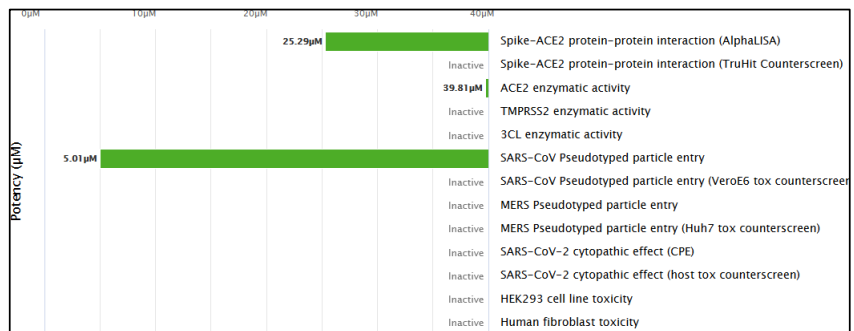

t. Brimonidine

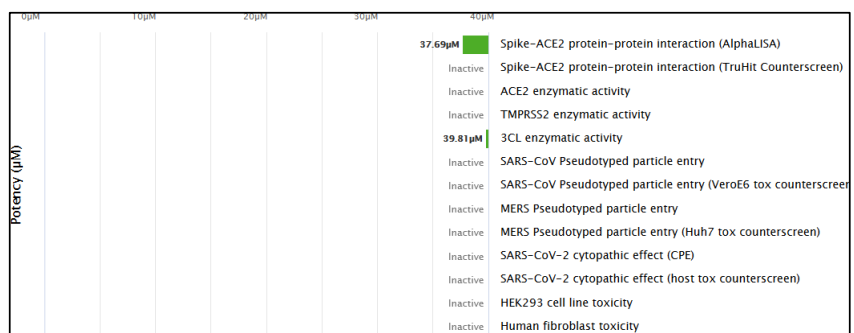

**Figure S5, continued**

**u. Repaglinide**

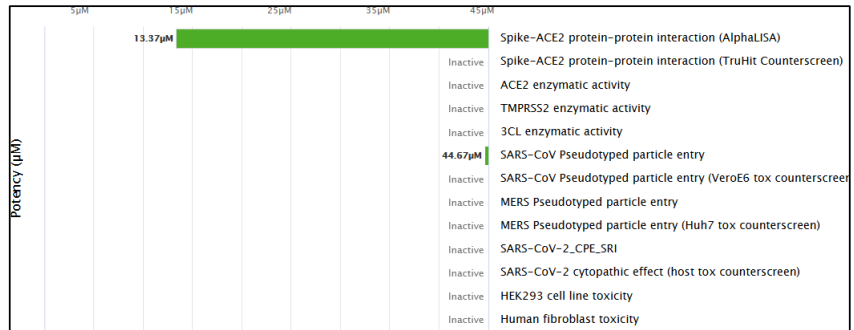

**v. Dienestrol**

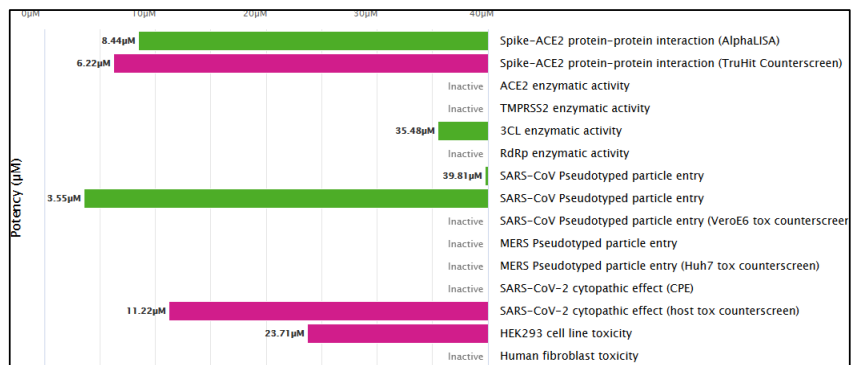

**w. Lurasidone**

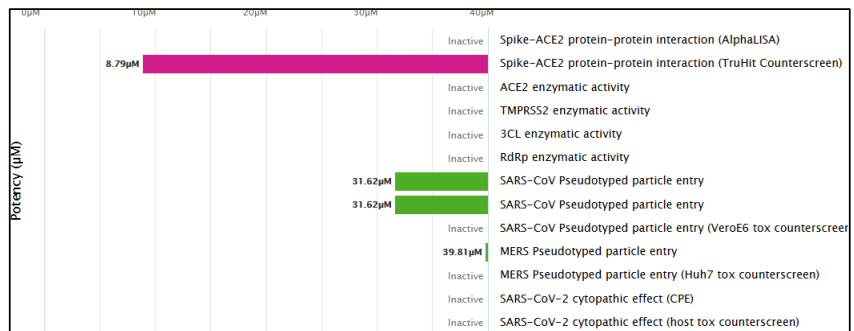

**Figure S5. Anti-SARS-CoV-2 profiles for the top 23 drugs.** Data were retrieved from NCATS (<https://opendata.ncats.nih.gov/covid19/assays>).

**Figure S6**

**a. Norfloxacin**

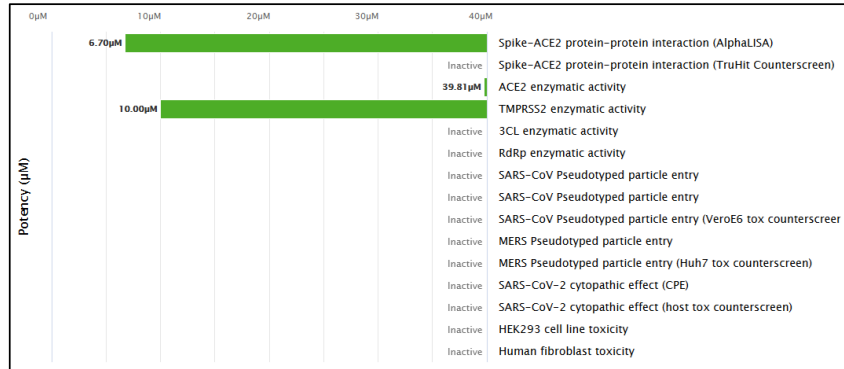

**b. Isoconazole**

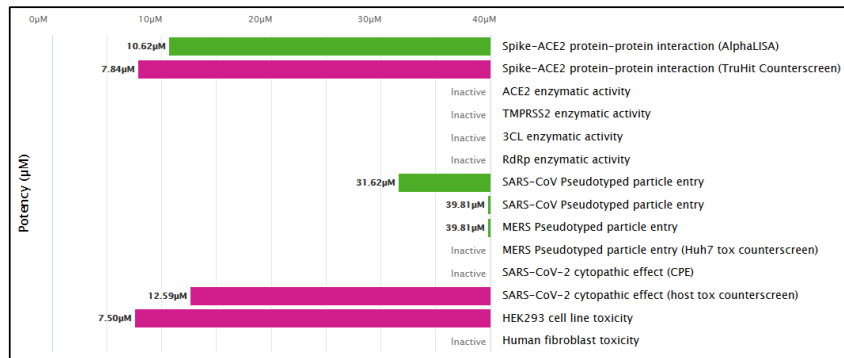

**c. Rucaparib**

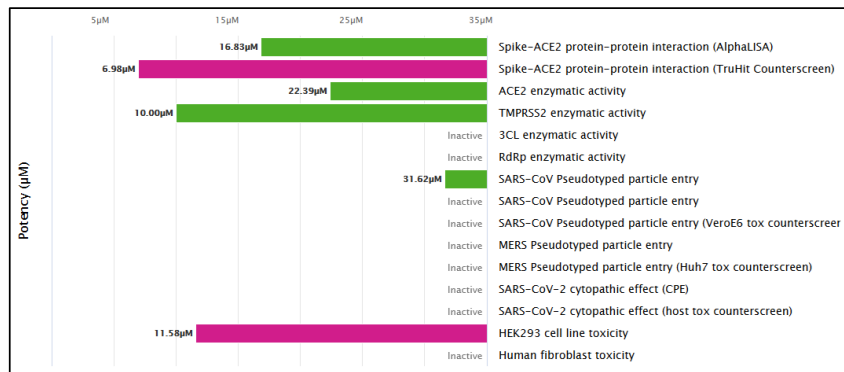

**Figure S6. Anti-SARS-CoV-2 profiles for the three drugs identified by combining all four interactomes.** Data were retrieved from NCATS (<https://opendata.ncats.nih.gov/covid19/assays>).
